# Supplementary material for: Slug Is Increased in Vascular Remodeling and Induces a Smooth Muscle Cell Proliferative Phenotype
Source: PubMed Central journal article supplement (PMC4956159; doi:10.1371/journal.pone.0159460), 2016-07-21

**S3 Fig**

sictl

sislug

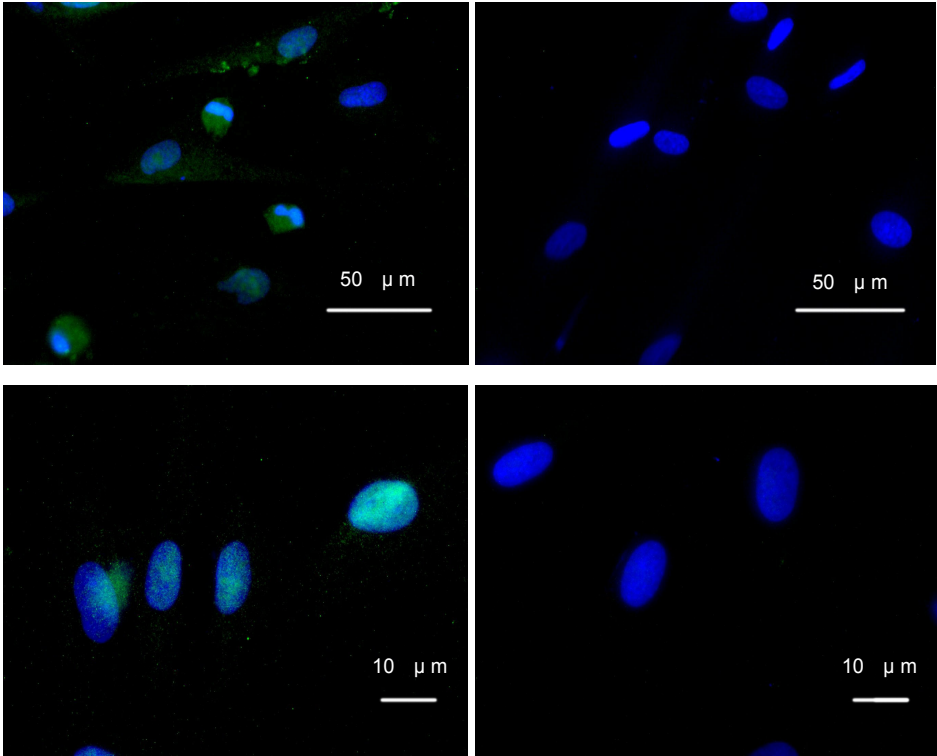

Supplement: pone.0159460.s004.pdf [file pone.0159460.s004.pdf]
