# Supplementary material for: Slug Is Increased in Vascular Remodeling and Induces a Smooth Muscle Cell Proliferative Phenotype
Source: PubMed Central journal article supplement (PMC4956159; doi:10.1371/journal.pone.0159460), 2016-07-21
Supplement: pone.0159460.s009.pdf [file pone.0159460.s009.pdf]

| <b>Term</b>                                | <b>Size</b> | <b>OddsRatio</b> | <b>Pvalue</b> | <b>GOBPID</b> |
|--------------------------------------------|-------------|------------------|---------------|---------------|
| cellular response to stimulus              | 4889        | 2,274211678      | 0,008233      | GO:0051716    |
| cell communication                         | 4616        | 2,240660138      | 0,009362      | GO:0007154    |
| response to stress                         | 2883        | 3,50146648       | 0,000142      | GO:0006950    |
| regulation of response to stimulus         | 2413        | 2,872706422      | 0,002001      | GO:0048583    |
| response to organic substance              | 1942        | 3,727620654      | 0,000189      | GO:0010033    |
| cell proliferation                         | 1498        | 2,765109381      | 0,008739      | GO:0008283    |
| regulation of programmed cell death        | 1048        | 3,071960298      | 0,009225      | GO:0043067    |
| positive regulation of signal transduction | 819         | 3,396551724      | 0,00838       | GO:0009967    |
| immune response                            | 730         | 7,299385774      | 2,55E-05      | GO:0006955    |
| interspecies interaction between organisms | 640         | 4,418888231      | 0,002165      | GO:0044419    |
| multi-organism cellular process            | 587         | 4,842672414      | 0,001319      | GO:0044764    |
| inflammatory response                      | 478         | 4,987673344      | 0,002343      | GO:0006954    |
| regulation of defense response             | 438         | 5,466329966      | 0,001505      | GO:0031347    |
| regulation of cell motility                | 415         | 4,666427547      | 0,006607      | GO:2000145    |
| modification of morphology                 | 350         | 5,573316283      | 0,003218      | GO:0051817    |

**Supplemental Table III** : Summary of GO Terms analysis of Biological Pathways.
