# Supplementary material for: Slug Is Increased in Vascular Remodeling and Induces a Smooth Muscle Cell Proliferative Phenotype
Source: PubMed Central journal article supplement (PMC4956159; doi:10.1371/journal.pone.0159460), 2016-07-21
Supplement: pone.0159460.s010.pdf [file pone.0159460.s010.pdf]

|                               | <b>NS<br/>(n=4)</b> | <b>S<br/>(n=7)</b> | <b>COPD<br/>(n=7)</b> |
|-------------------------------|---------------------|--------------------|-----------------------|
| <b>BMI (kg/m<sup>2</sup>)</b> | 25 ± 5              | 27 ± 4             | 26 ± 3                |
| <b>FEV1 (%predicted)</b>      | 102 ± 15            | 90 ± 13            | 67 ± 11* †            |
| <b>FVC (%predicted)</b>       | 110 ± 26            | 119 ± 13           | 99 ± 19               |
| <b>FEV1/FVC (%predicted)</b>  | 73 ± 5              | 74 ± 4             | 57 ± 9* †             |
| <b>Dlco (%predicted)</b>      | 92 ± 9              | 83 ± 8             | 71 ± 10*              |
| <b>PaO2 (mmHg)</b>            | 90 ± 19             | 87 ± 11            | 75 ± 9*               |
| <b>Distribution R1\R2\R3</b>  | 1\1\2               | 2\3\2              | 1\3\3                 |
